# Supplementary material for: MRI-based Alzheimer’s disease-resemblance atrophy index in the detection of preclinical and prodromal Alzheimer’s disease
Source: publisher site journal article supplement (doi:10.18632/aging.203082), 2021-05-25
Supplement: Supplementary file [file aging-v13i10-203082-supplementary-material-SD1.pdf]

## SUPPLEMENTARY TABLES

**Supplementary Table 1A. Performance metrics of derived AD-RAI, HV and HF in differentiating converters and stable subjects from ADNI-2 database among all subjects (n=158).**

| Measures       | Sensitivity (95% CI) | Specificity (95% CI) | Positive predictive value | Negative predictive value | Accuracy |
|----------------|----------------------|----------------------|---------------------------|---------------------------|----------|
| AD-RAI (≥ 0.5) | 0.64 (0.50-0.76)     | 0.79 (0.69-0.86)     | 63.79%                    | 79.00%                    | 73.42%   |
| HV (≤ 6.44mL)  | 0.67 (0.53-0.79)     | 0.62 (0.52-0.71)     | 50.65%                    | 76.54%                    | 63.92%   |
| HF (≤ 0.42%)   | 0.64 (0.50-0.76)     | 0.56 (0.46-0.66)     | 45.68%                    | 72.73%                    | 58.86%   |

AD-RAI=Alzheimer's disease resemblance atrophy index; HV=hippocampal volume; HF=hippocampal fraction; ADNI=Alzheimer's Disease Neuroimaging Initiatives; CI=confidence interval.

**Supplementary Table 1B. Performance metrics of derived AD-RAI, HV and HF in differentiating converters and stable subjects from ADNI-2 database among MCI subjects (n=85).**

| Measures       | Sensitivity (95% CI) | Specificity (95% CI) | Positive predictive value | Negative predictive value | Accuracy |
|----------------|----------------------|----------------------|---------------------------|---------------------------|----------|
| AD-RAI (≥ 0.5) | 0.80 (0.63-0.91)     | 0.60 (0.45-0.73)     | 58.33%                    | 81.08%                    | 68.24%   |
| HV (≤ 6.07mL)  | 0.66 (0.48-0.80)     | 0.62 (0.47-0.75)     | 54.76%                    | 72.09%                    | 63.53%   |
| HF (≤ 0.41%)   | 0.63 (0.45-0.78)     | 0.54 (0.39-0.68)     | 48.89%                    | 67.50%                    | 57.65%   |

AD-RAI=Alzheimer's disease resemblance atrophy index; HV=hippocampal volume; HF=hippocampal fraction; ADNI=Alzheimer's Disease Neuroimaging Initiatives; MCI=mild cognitive impairment; CI=confidence interval.

**Supplementary Table 1C. Performance metrics of derived AD-RAI, HV and HF in differentiating converters and stable subjects from ADNI-2 database among NC subjects (n=73).**

| Measures       | Sensitivity (95% CI) | Specificity (95% CI) | Positive predictive value | Negative predictive value | Accuracy |
|----------------|----------------------|----------------------|---------------------------|---------------------------|----------|
| AD-RAI (≥ 0.5) | 0.39 (0.20-0.61)     | 0.98 (0.88-1.00)     | 90.00%                    | 77.78%                    | 79.45%   |
| HV (≤ 6.64mL)  | 0.70 (0.47-0.86)     | 0.62 (0.47-0.75)     | 45.71%                    | 81.58%                    | 64.38%   |
| HF (≤ 0.44%)   | 0.65 (0.43-0.83)     | 0.58 (0.43-0.72)     | 41.67%                    | 78.38%                    | 60.27%   |

AD-RAI=Alzheimer's disease resemblance atrophy index; HV=hippocampal volume; HF=hippocampal fraction; ADNI=Alzheimer's Disease Neuroimaging Initiatives; NC=normal control; CI=confidence interval.

**Supplementary Table 2. Performance metrics of AD-RAI, HV, HF and MTA among dementia subjects in CU-SEEDS cohort (n=10).**

| Measures                             | Sensitivity (95% CI) | Specificity (95% CI) | Positive predictive value | Negative predictive value | Accuracy |
|--------------------------------------|----------------------|----------------------|---------------------------|---------------------------|----------|
| AD-RAI ( $\geq 0.5$ )                | 0.90 (0.54-0.99)     | NA                   | 100.00%                   | 0                         | 90.00%   |
| HV ( $\leq 5.71\text{mL}^*$ )        | 0.80 (0.44-0.96)     | NA                   | 100.00%                   | 0                         | 80.00%   |
| HF ( $\leq 0.38\%^*$ )               | 0.50 (0.20-0.80)     | NA                   | 100.00%                   | 0                         | 50.00%   |
| MTA (Adjusted by age <sup>**</sup> ) | 0.80 (0.44-0.96)     | NA                   | 100.00%                   | 0                         | 80.00%   |

AD-RAI=Alzheimer's disease resemblance atrophy index; HV=hippocampal volume; HF=hippocampal fraction; MTA=medial temporal lobe atrophy; CU-SEEDS= The Chinese University of Hong Kong - Screening for Early Alzheimer's Disease; CI=confidence interval. \*The cutoff of HV ( $\leq 5.71\text{mL}$ ) and HF ( $\leq 0.38\%$ ) used here were also derived from previous study [1]. \*\*The cut-off scores of MTA: under 75 years  $\geq 1.5$  and  $\geq 75$  years  $\geq 2$  [2].

**Supplementary Table 3A. Performance metrics of AD-RAI and MTA among MCI and CU subjects harboring A+ (n=128).**

| Measures                    | Sensitivity (95% CI) | Specificity (95% CI) | Positive predictive value | Negative predictive value | Accuracy |
|-----------------------------|----------------------|----------------------|---------------------------|---------------------------|----------|
| AD-RAI ( $\geq 0.5$ )       | 0.65 (0.49-0.77)     | 0.94 (0.85-0.98)     | 86.11%                    | 81.52%                    | 82.81%   |
| HV ( $\leq 6.44\text{mL}$ ) | 0.65 (0.49-0.77)     | 0.78 (0.67-0.86)     | 63.27%                    | 78.48%                    | 72.66%   |
| HF ( $\leq 0.42\%$ )        | 0.46 (0.32-0.61)     | 0.94 (0.85-0.98)     | 81.48%                    | 74.26%                    | 75.78%   |
| MTA ( $\geq 1$ )            | 0.48 (0.34-0.63)     | 0.90 (0.81-0.95)     | 74.19%                    | 74.23%                    | 74.22%   |

AD-RAI=Alzheimer's disease resemblance atrophy index; HV=hippocampal volume; HF=hippocampal fraction; MTA=medial temporal lobe atrophy; CI=confidence interval.

**Supplementary Table 3B. Performance metrics of AD-RAI, HF, HV and MTA among MCI subjects harboring A+ (n=50).**

| Measures                    | Sensitivity (95% CI) | Specificity (95% CI) | Positive predictive value | Negative predictive value | Accuracy |
|-----------------------------|----------------------|----------------------|---------------------------|---------------------------|----------|
| AD-RAI ( $\geq 0.5$ )       | 0.86 (0.66-0.95)     | 0.86 (0.64-0.96)     | 88.89%                    | 82.61%                    | 86.00%   |
| HV ( $\leq 6.07\text{mL}$ ) | 0.68 (0.48-0.83)     | 0.95 (0.75-1.00)     | 95.00%                    | 70.00%                    | 80.00%   |
| HF ( $\leq 0.41\%$ )        | 0.54 (0.34-0.72)     | 0.95 (0.75-1.00)     | 93.75%                    | 61.76%                    | 72.00%   |
| MTA ( $\geq 1$ )            | 0.64 (0.44-0.81)     | 0.86 (0.64-0.96)     | 85.71%                    | 65.52%                    | 74.00%   |

AD-RAI=Alzheimer's disease resemblance atrophy index; HV=hippocampal volume; HF=hippocampal fraction; MTA=medial temporal lobe atrophy; MCI=mild cognitive impairment; CI=confidence interval.

**Supplementary Table 3C. Performance metrics of AD-RAI, HF, HV and MTA among CU subjects harboring A+ (n=78).**

| Measures                       | Sensitivity (95% CI) | Specificity (95% CI) | Positive predictive value | Negative predictive value | Accuracy |
|--------------------------------|----------------------|----------------------|---------------------------|---------------------------|----------|
| AD-RAI<br>( $\geq 0.5$ )       | 0.35 (0.16-0.59)     | 0.97 (0.87-0.99)     | 77.78%                    | 81.16%                    | 80.77%   |
| HV<br>( $\leq 6.64\text{mL}$ ) | 0.70 (0.46-0.87)     | 0.91 (0.80-0.97)     | 73.68%                    | 89.83%                    | 85.90%   |
| HF<br>( $\leq 0.44\%$ )        | 0.35 (0.16-0.59)     | 0.97 (0.87-0.99)     | 77.78%                    | 81.16%                    | 80.77%   |
| MTA<br>( $\geq 1$ )            | 0.25 (0.10-0.49)     | 0.91 (0.80-0.97)     | 50.00%                    | 77.94%                    | 74.36%   |

AD-RAI=Alzheimer's disease resemblance atrophy index; HV=hippocampal volume; HF=hippocampal fraction; MTA=medial temporal lobe atrophy; CU=cognitively unimpaired; CI=confidence interval.

## SUPPLEMENTARY REFERENCES

1. Abrigo J, Shi L, Luo Y, Chen Q, Chu WCW, Mok VCT; Alzheimer's Disease Neuroimaging Initiative. Standardization of hippocampus volumetry using automated brain structure volumetry tool for an initial Alzheimer's disease imaging biomarker. *Acta Radiol.* 2019; 60:769–76.  
<https://doi.org/10.1177/0284185118795327>  
PMID:[30185071](https://pubmed.ncbi.nlm.nih.gov/30185071/)
2. Pereira JB, Cavallin L, Spulber G, Aguilar C, Mecocci P, Vellas B, Tsolaki M, Kłoszewska I, Soininen H, Spenger C, Aarsland D, Lovestone S, Simmons A, Wahlund LO, Westman E; AddNeuroMed consortium and for the Alzheimer's Disease Neuroimaging Initiative. Influence of age, disease onset and ApoE4 on visual medial temporal lobe atrophy cut-offs. *J Intern Med.* 2014; 275:317–30.  
<https://doi.org/10.1111/joim.12148>  
PMID:[24118559](https://pubmed.ncbi.nlm.nih.gov/24118559/)
